# Supplementary material
Source: publisher site journal article supplement (https://www.spandidos-publications.com/2279/downloadSupplementary)
Supplement: Supplementary file 1 [file downloadSupplementary]

## Sheet: upregulated pathway
Table SV. Pathways controlled by over- and underexpressed microRNAs in the primary Sjögren syndrome activation group.
Path name	(-LgP)
Pathways in cancer	21.6808
Proteoglycans in cancer	19.8543
MAPK signaling pathway	19.6336
Axon guidance	18.5976
Regulation of actin cytoskeleton	16.771
Focal adhesion	15.8822
Glutamatergic synapse	15.3053
Endocytosis	13.7096
Long-term potentiation	13.2051
Calcium signaling pathway	12.9272
GnRH signaling pathway	12.5364
Hippo signaling pathway	11.8281
PI3K-Akt signaling pathway	11.7471
Morphine addiction	11.4854
Transcriptional misregulation in cancer	10.8902
Dopaminergic synapse	10.5936
Hepatitis B	10.0988
HTLV-I infection	9.99058
Estrogen signaling pathway	9.90289
Glioma	9.89889
Neurotrophin signaling pathway	9.86085
Circadian entrainment	9.31762
Amphetamine addiction	9.31085
ErbB signaling pathway	9.28185
Insulin signaling pathway	9.15182
Oocyte meiosis	8.88883
GABAergic synapse	8.24181
Chemokine signaling pathway	8.12968
Adherens junction	8.07462
Cholinergic synapse	8.02896
HIF-1 signaling pathway	7.76973
Wnt signaling pathway	7.51673
Prostate cancer	7.49838
Retrograde endocannabinoid signaling	7.21685
Chagas disease (American trypanosomiasis)	7.07454
mTOR signaling pathway	6.66933
Melanogenesis	6.59973
Endometrial cancer	6.57753
Melanoma	6.52365
Phosphatidylinositol signaling system	6.52019
TGF-beta signaling pathway	6.52019
Non-small cell lung cancer	6.36708
Fc gamma R-mediated phagocytosis	6.33303
Alcoholism	6.22859
Gastric acid secretion	6.19024
Bacterial invasion of epithelial cells	6.03226
Long-term depression	5.79251
Neuroactive ligand-receptor interaction	5.79112
Dilated cardiomyopathy	5.78923
Colorectal cancer	5.61755
Chronic myeloid leukemia	5.54527
T cell receptor signaling pathway	5.43879
Vascular smooth muscle contraction	5.43816
Pancreatic cancer	5.28899
Bladder cancer	5.28103
mRNA surveillance pathway	5.00008
Fc epsilon RI signaling pathway	4.98583
Hypertrophic cardiomyopathy (HCM)	4.72186
Synaptic vesicle cycle	4.64803
Arrhythmogenic right ventricular cardiomyopathy (ARVC)	4.63787
Cytokine-cytokine receptor interaction	4.59716
Ubiquitin mediated proteolysis	4.55209
SNARE interactions in vesicular transport	4.54847
Renal cell carcinoma	4.5033
Acute myeloid leukemia	4.38567
Thyroid cancer	4.38076
p53 signaling pathway	4.36431
Notch signaling pathway	4.29339
Jak-STAT signaling pathway	4.28447
Aldosterone-regulated sodium reabsorption	4.24165
Tight junction	4.14102
Osteoclast differentiation	4.09837
Inositol phosphate metabolism	4.09208
Dorso-ventral axis formation	3.99674
Small cell lung cancer	3.9721
Insulin secretion	3.91738
Protein digestion and absorption	3.86352
Tuberculosis	3.85973
Serotonergic synapse	3.84338
Glycerophospholipid metabolism	3.70691
Hepatitis C	3.61489
Metabolic pathways	3.55407
Lysosome	3.49835
Pancreatic secretion	3.46131
Adipocytokine signaling pathway	3.45884
Endocrine and other factor-regulated calcium reabsorption	3.40654
Progesterone-mediated oocyte maturation	3.32074
Nicotine addiction	3.29225
Mineral absorption	3.26624
Glycosaminoglycan biosynthesis - heparan sulfate / heparin	3.00299
Epithelial cell signaling in Helicobacter pylori infection	2.95058
Amoebiasis	2.89995
Cell cycle	2.87401
Bile secretion	2.74549
Type II diabetes mellitus	2.72069
ECM-receptor interaction	2.66496
Lysine degradation	2.65815
Cell adhesion molecules (CAMs)	2.63701
Pertussis	2.6018
Cocaine addiction	2.59729
Gap junction	2.58021
Salivary secretion	2.53885
Cardiac muscle contraction	2.5104
Amyotrophic lateral sclerosis (ALS)	2.36929
Basal cell carcinoma	2.31584
Epstein-Barr virus infection	2.26042
Valine, leucine and isoleucine biosynthesis	2.22109
African trypanosomiasis	2.14712
Leukocyte transendothelial migration	2.06559
Glycosphingolipid biosynthesis - ganglio series	2.05926
Influenza A	1.99145
B cell receptor signaling pathway	1.97091
Toxoplasmosis	1.9444
Natural killer cell mediated cytotoxicity	1.89042
Viral carcinogenesis	1.87255
Ovarian steroidogenesis	1.86817
VEGF signaling pathway	1.76405
Phototransduction	1.72047
Measles	1.6157
Circadian rhythm	1.59263
ABC transporters	1.56963
Apoptosis	1.54612
Vasopressin-regulated water reabsorption	1.52166
Alzheimer's disease	1.50273
Purine metabolism	1.4538
Shigellosis	1.43674
Prion diseases	1.31557

## Sheet: downregulated pathway
Path name	(-LgP)
Pathways in cancer	28.1757
PI3K-Akt signaling pathway	25.7291
Proteoglycans in cancer	21.7848
HTLV-I infection	21.3721
MAPK signaling pathway	19.7132
Hepatitis B	19.5849
Axon guidance	18.8414
Transcriptional misregulation in cancer	18.7812
Non-small cell lung cancer	18.7643
Focal adhesion	17.9964
Neurotrophin signaling pathway	17.3713
Chronic myeloid leukemia	17.1623
Insulin signaling pathway	16.8651
Glioma	16.3784
Prostate cancer	15.6495
Estrogen signaling pathway	15.1348
Endocytosis	14.301
mTOR signaling pathway	13.9076
T cell receptor signaling pathway	13.2439
Glutamatergic synapse	13.0535
Renal cell carcinoma	12.9076
Pancreatic cancer	12.9076
ErbB signaling pathway	12.8341
Gap junction	11.7759
TGF-beta signaling pathway	10.8716
Melanoma	10.2111
GABAergic synapse	9.87955
Endometrial cancer	9.83558
Hippo signaling pathway	9.81074
GnRH signaling pathway	9.67714
p53 signaling pathway	9.6364
Chemokine signaling pathway	9.51406
Oocyte meiosis	9.47091
Colorectal cancer	9.43823
Progesterone-mediated oocyte maturation	9.42536
Small cell lung cancer	9.42536
Wnt signaling pathway	9.30237
Circadian entrainment	9.19612
Ubiquitin mediated proteolysis	8.94068
Regulation of actin cytoskeleton	8.83742
Melanogenesis	8.83485
B cell receptor signaling pathway	8.72411
Cholinergic synapse	8.61045
Chagas disease (American trypanosomiasis)	8.49253
Adipocytokine signaling pathway	8.37556
Dilated cardiomyopathy	8.11207
Dopaminergic synapse	8.00582
Morphine addiction	7.93674
Circadian rhythm	7.91659
Retrograde endocannabinoid signaling	7.88377
Hypertrophic cardiomyopathy (HCM)	7.84088
Bladder cancer	7.80362
Tight junction	7.80129
Fc epsilon RI signaling pathway	7.60517
Calcium signaling pathway	7.48507
Salivary secretion	7.40303
Acute myeloid leukemia	7.22792
Hepatitis C	7.18009
Cell cycle	7.08121
Osteoclast differentiation	7.0536
Long-term depression	6.8993
Viral carcinogenesis	6.87153
Phosphatidylinositol signaling system	6.59084
ECM-receptor interaction	6.11307
Thyroid cancer	6.03524
Long-term potentiation	5.86039
Vasopressin-regulated water reabsorption	5.85448
Dorso-ventral axis formation	5.78647
Jak-STAT signaling pathway	5.76815
Adherens junction	5.69473
Fc gamma R-mediated phagocytosis	5.60972
VEGF signaling pathway	5.41025
Vascular smooth muscle contraction	5.33595
Toxoplasmosis	5.22427
Measles	5.19761
Tuberculosis	5.13575
Amyotrophic lateral sclerosis (ALS)	4.9363
HIF-1 signaling pathway	4.85771
Gastric acid secretion	4.79412
Protein processing in endoplasmic reticulum	4.78469
Alcoholism	4.77175
Bacterial invasion of epithelial cells	4.65399
Metabolic pathways	4.55585
Neuroactive ligand-receptor interaction	4.17332
Type II diabetes mellitus	3.85057
Aldosterone-regulated sodium reabsorption	3.83434
Serotonergic synapse	3.82857
mRNA surveillance pathway	3.74321
Inositol phosphate metabolism	3.62173
Shigellosis	3.62173
Arrhythmogenic right ventricular cardiomyopathy (ARVC)	3.42234
Apoptosis	3.34068
RNA transport	3.33082
Influenza A	3.32295
Basal cell carcinoma	3.32075
Olfactory transduction	3.27857
Cytokine-cytokine receptor interaction	3.27103
Amphetamine addiction	3.06382
Pancreatic secretion	2.95422
RNA degradation	2.95331
Lysosome	2.93746
Hedgehog signaling pathway	2.88203
Ovarian steroidogenesis	2.88203
Epstein-Barr virus infection	2.835
Insulin secretion	2.79951
Pertussis	2.79546
Natural killer cell mediated cytotoxicity	2.76952
Glycosaminoglycan biosynthesis - heparan sulfate / heparin	2.72598
Amoebiasis	2.41823
N-Glycan biosynthesis	2.32259
Endocrine and other factor-regulated calcium reabsorption	2.32259
Cocaine addiction	2.2636
Mineral absorption	2.20621
Other types of O-glycan biosynthesis	2.17876
Leukocyte transendothelial migration	2.1012
Alanine, aspartate and glutamate metabolism	2.02749
Pathogenic Escherichia coli infection	1.99146
Toll-like receptor signaling pathway	1.96652
RIG-I-like receptor signaling pathway	1.83151
Glycosylphosphatidylinositol(GPI)-anchor biosynthesis	1.79135
Bile secretion	1.79033
Notch signaling pathway	1.73572
Leishmaniasis	1.63375
Cell adhesion molecules (CAMs)	1.59499
Glycerophospholipid metabolism	1.5932
Synaptic vesicle cycle	1.58046
Sulfur relay system	1.49909
Antigen processing and presentation	1.42091
Herpes simplex infection	1.36643
D-Glutamine and D-glutamate metabolism	1.36512
